# Supplementary material
Source: publisher figshare collection journal article supplement (https://frontiersin.figshare.com/ndownloader/files/14284604)
Supplement: Supplementary file [file 14284604]

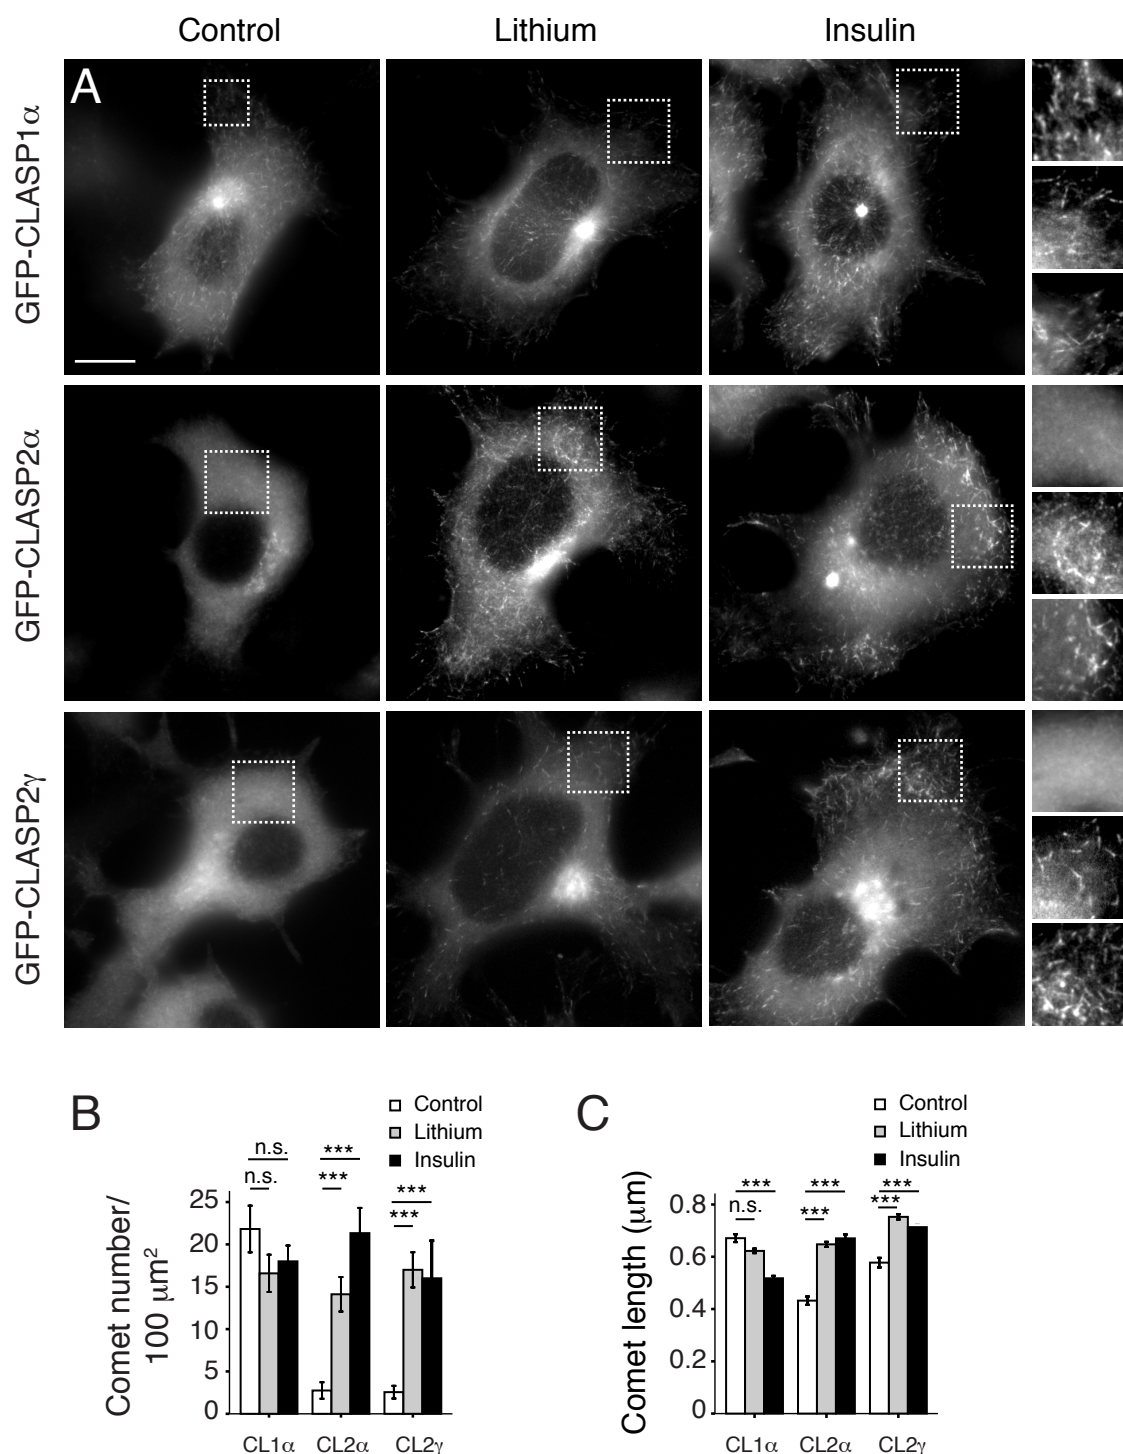

Figure S2. Differential regulation of GFP-CLASPs by GSK3 and Insulin.

**A**) N1E-115 cells were transfected with GFP-CLASP1 $\alpha$  (upper panels), GFP-CLASP2 $\alpha$  (middle panels) or GFP-CLASP2 $\gamma$  (lower panels), and treated with lithium chloride (20 mM) and myo-Inositol (10 mM) for 4 hours (Lithium), or insulin (2  $\mu\text{g}/\text{ml}$ ) for 10 min (before the treatments, cells were serum starved overnight). Cells were fixed after treatments. Fluorescence images show control and treated cells expressing low levels of GFP-tagged CLASPs. Scale bar= 20  $\mu\text{m}$ . **B**) Quantification of the number of GFP-CLASP comets/100  $\mu\text{m}^2$ . **C**) Quantification of the length of GFP-CLASP-comets (in  $\mu\text{m}$ ). SEM is depicted in the bar graphs. Anova tests were performed in B) and C).
